# Supplementary material
Source: PubMed Central journal article supplement (PMC8505814)

**Supplementary Figure 1. Food frequency before and during COVID-19 (Ankara, 2020)**

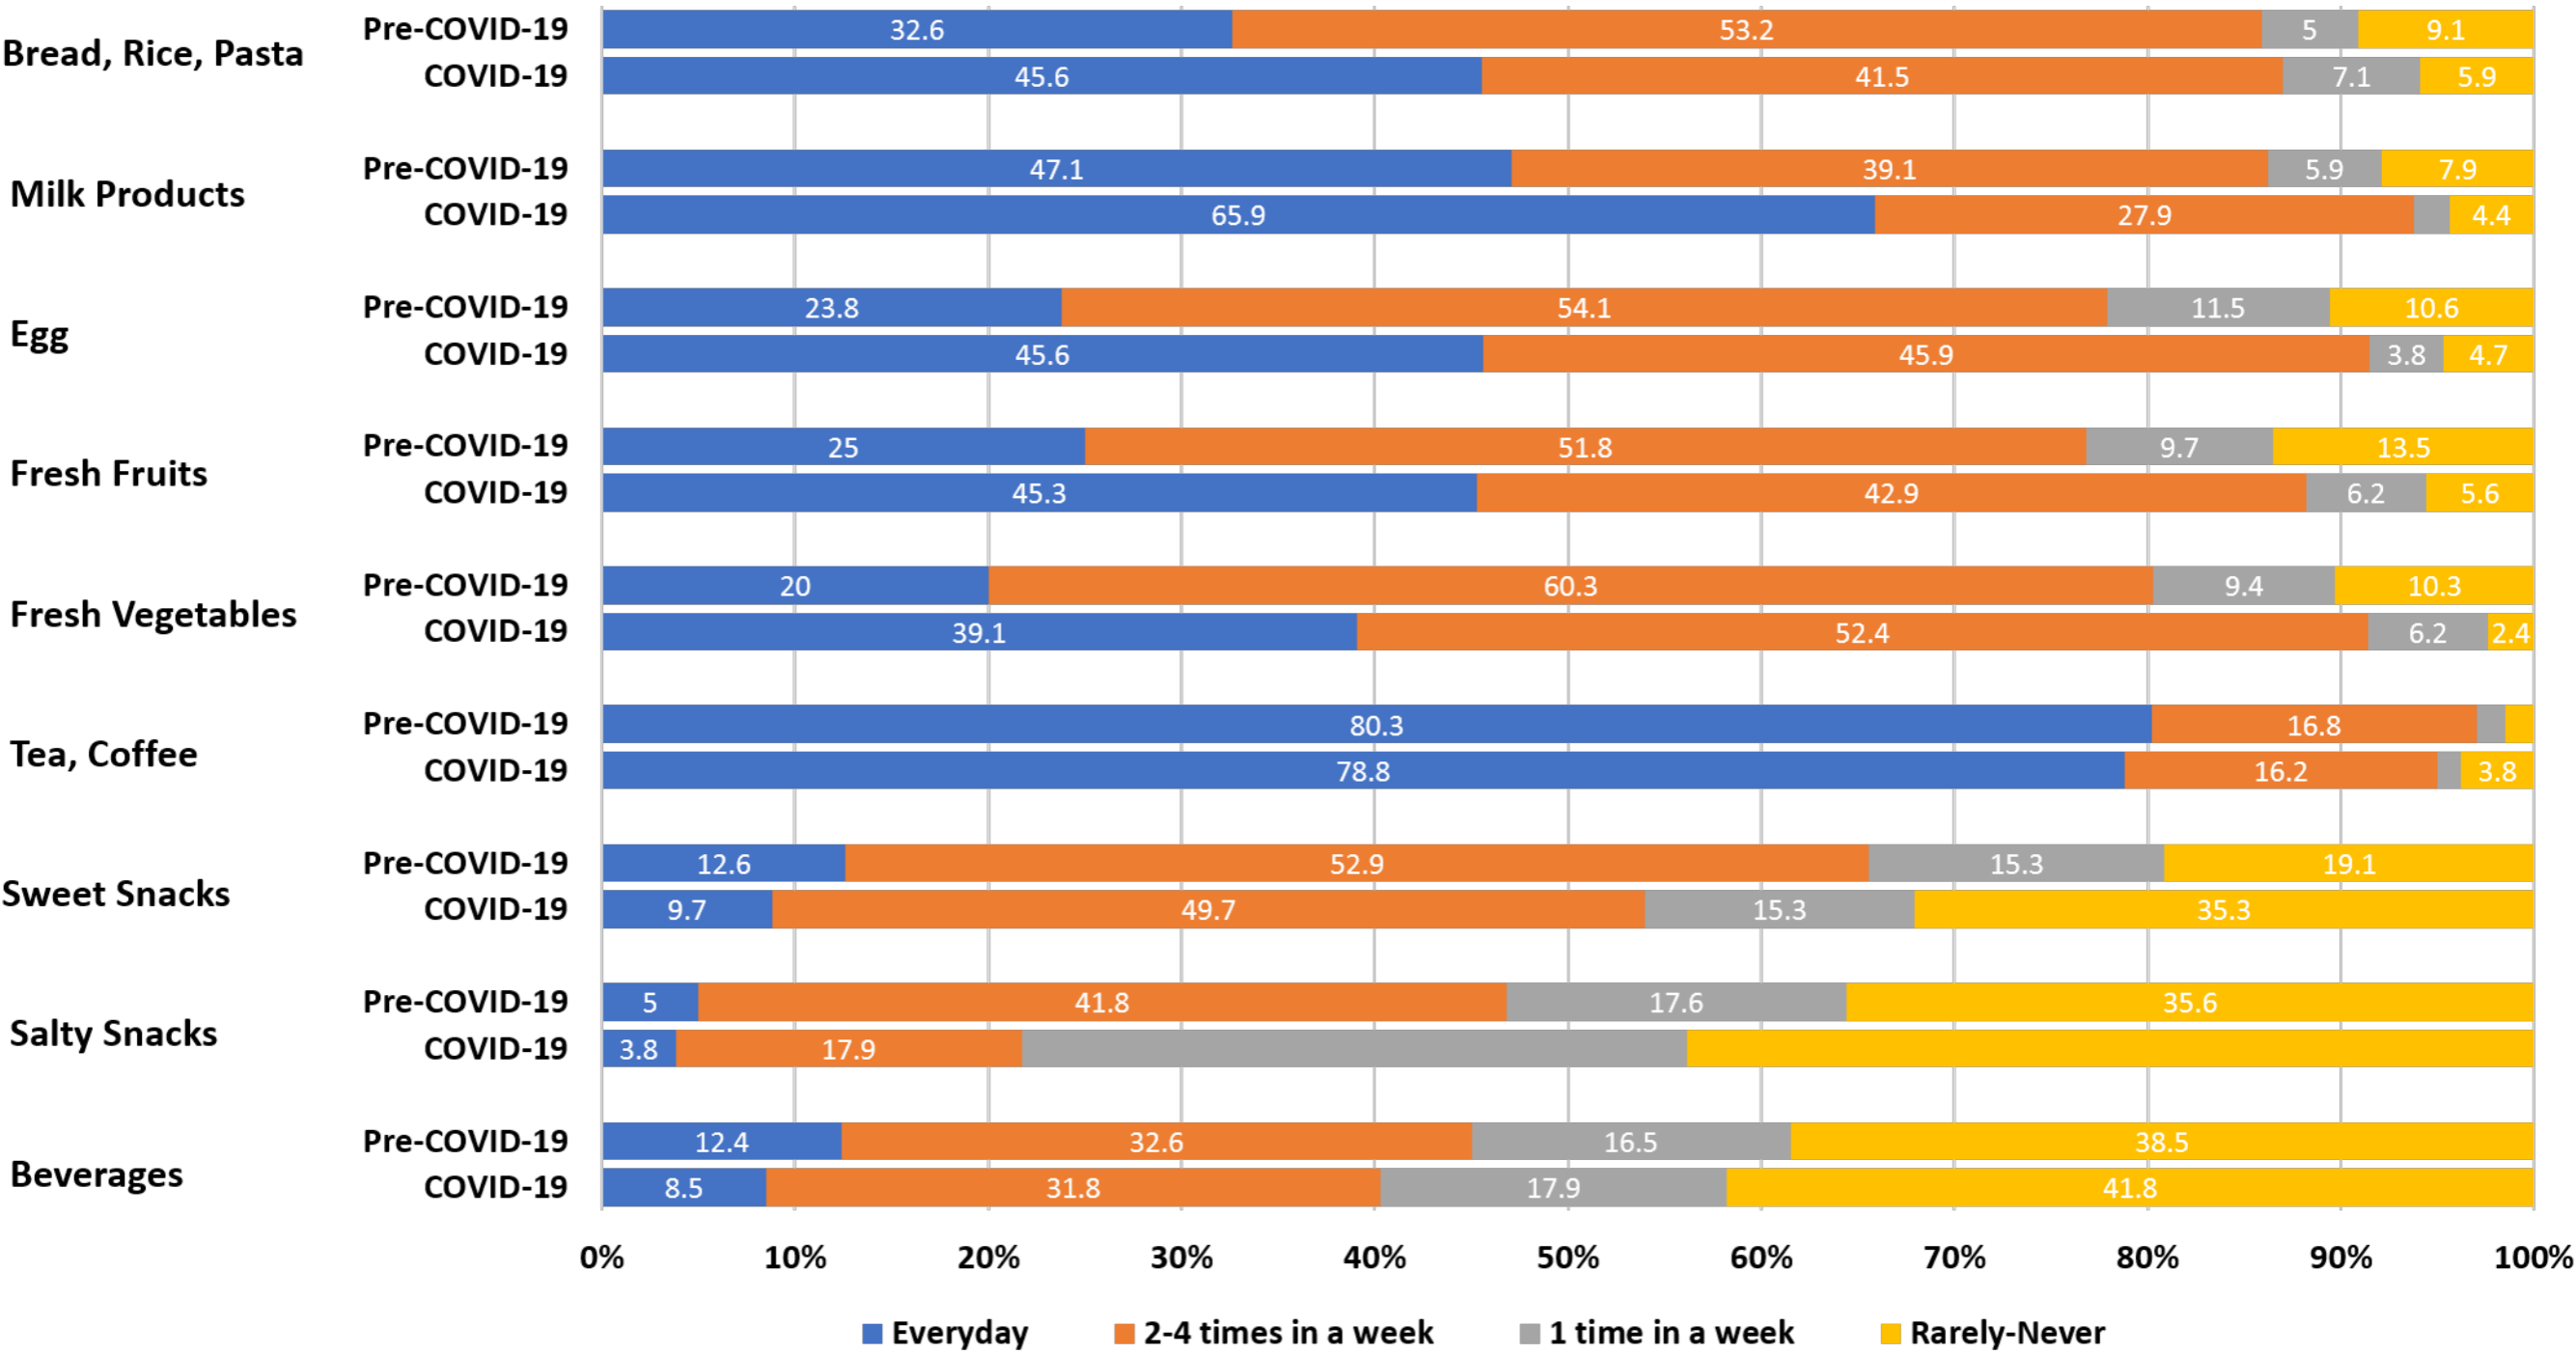

Supplement: S1368980021003906sup001.pdf [file S1368980021003906sup001.pdf]
